# Supplementary material for: A Portable Wireless Intelligent Nanosensor for 6,7-Dihydroxycoumarin Analysis with A Black Phosphorene and Nano-Diamond Nanocomposite-Modified Electrode
Source: MDPI journal article supplement (doi:10.3390/bios13020153), 2023-01-18
Supplement: s1 [file s1]

# A Portable Wireless Intelligent Nanosensor for 6,7-Dihydroxycoumarin Analysis with A Black Phosphorene and Nano-Diamond Nanocomposite-Modified Electrode

Xiaoqing Li <sup>1,2</sup>, Lisi Wang <sup>1</sup>, Lijun Yan <sup>1</sup>, Xiao Han <sup>1</sup>, Zejun Zhang <sup>1</sup>, Xiaoping Zhang <sup>1</sup> and Wei Sun <sup>1,\*</sup>

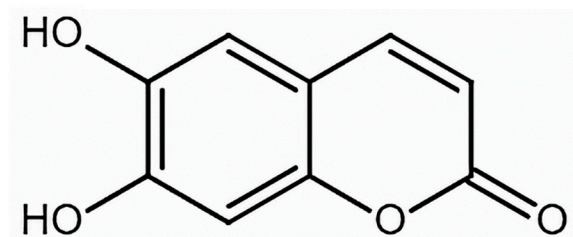

**Figure S1.** The structural diagram of 6,7-DHC.

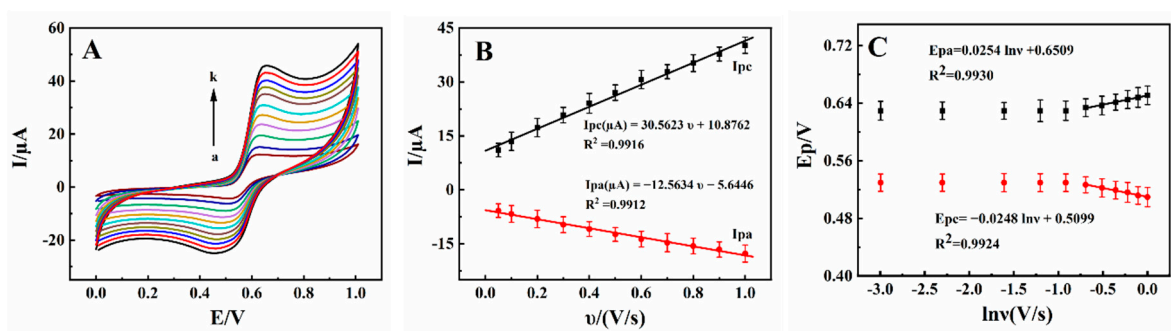

**Figure S2.** (A) CV curves of 0.1 mmol/L 6,7-DHC in 0.1 mol/L pH 3.0 PBS on ND@BP/SPE at different scan rates (from a to k: 0.05, 0.1, 0.2, 0.3, 0.4, 0.5, 0.6, 0.7, 0.8, 0.9, 1.0 V/s); (B) Linear relationship of  $I_p$  versus  $\nu$  ( $n = 3$ ); (C) Linear relationship of  $E_p$  versus  $\ln \nu$  ( $n = 3$ ).

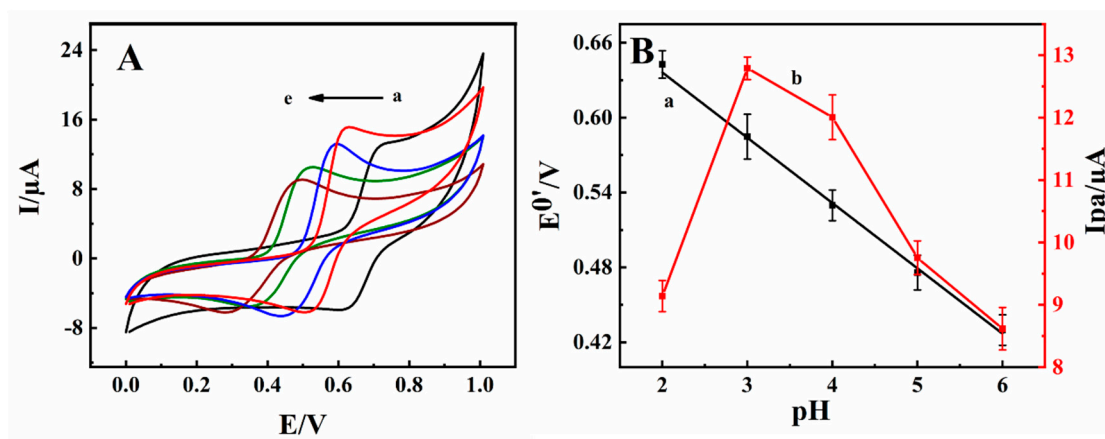

**Figure S3.** (A) CV curves of 0.1 mmol/L 6,7-DHC in 0.1 mol/L pH 3.0 PBS on ND@BP/SPE at different pH values (from a to e: 2.0, 3.0, 4.0, 5.0, and 6.0) at the scan rate of 100 mV/s; (B) The relationship between  $E^{\circ'}$  versus pH (a) and the plot of  $I_{pa}$  versus pH (b) ( $n = 3$ ).
